# Supplementary material for: Structural basis for the recognition and cleavage of histone H3 by cathepsin L
Source: PubMed Central journal article supplement — Nat Commun. 2011 Feb 15;2:197–. doi: 10.1038/ncomms1204 (PMC3105313; doi:10.1038/ncomms1204), 2011-02-15
Supplement: ncomms1204-s1.pdf [file ncomms1204-s1.pdf]

# Structural basis for the recognition and cleavage of histone H3 by cathepsin L

Melanie A. Adams-Cioaba, Joanne C. Krupa, Chao Xu, John S. Mort and Jinrong Min

| H3 Peptides*                    | Sequence**                                          | (%) Inhibition*** |
|---------------------------------|-----------------------------------------------------|-------------------|
| H3 <sub>1-41</sub>              | ARTKQTARKSTGGKAPRKQLATKAARK SA...KPHRY              | 88.4 ± 0.9        |
| H3 <sub>4-19</sub> K14ac        | KQTARKSTGGK <sub>ac</sub> APRK Q                    | 4.3 ± 0.7         |
| H3 <sub>5-29</sub> K14ac        | QTARKSTGGK <sub>ac</sub> APRK QLATK AARK SA         | 84.5 ± 0.4        |
| H3 <sub>14-31</sub>             | K APRK QLATK AARK SAPA                              | 85.4 ± 0.3        |
| H3 <sub>14-31</sub> L20A        | K APRK QAATK AARK SAPA                              | 13 ± 1            |
| H3 <sub>14-31</sub> L20AK27me3  | K APRK QAATK AARK <sub>27</sub> SAPA                | 19 ± 2            |
| H3 <sub>14-31</sub> Q19A        | K APRK ALATK AARK SAPA                              | 82.5 ± 0.4        |
| H3 <sub>14-31</sub> Q19A/L20A   | K APRK AAATK AARK SAPA                              | 14.9 ± 0.6        |
| H3 <sub>14-31</sub> K18ac       | K APRK <sub>ac</sub> QLATK AARK SAPA                | 68.7 ± 0.2        |
| H3 <sub>14-31</sub> K23ac       | K APRK QLATK <sub>ac</sub> AARK SAPA                | 82 ± 2            |
| H3 <sub>14-31</sub> K18ack27me2 | K APRK <sub>ac</sub> QLATK AARK <sub>me2</sub> SAPA | 72.6 ± 0.7        |
| H3 <sub>14-31</sub> K23ack27me2 | K APRK QLATK <sub>ac</sub> AARK <sub>me2</sub> SAPA | 83.9 ± 0.3        |
| H3 <sub>14-31</sub> K18ack23Ac  | K APRK <sub>ac</sub> QLATK <sub>ac</sub> AARK SAPA  | 67.7 ± 0.1        |
| H3 <sub>14-31</sub> K27me2      | K APRK QLATK AARK <sub>me2</sub> SAPA               | 85.0 ± 0.1        |
| H3 <sub>14-31</sub> K27me3      | K APRK QLATK AARK <sub>me3</sub> SAPA               | 84 ± 1            |
| H3 <sub>19-33</sub>             | QLATK AARK SAPATG                                   | 32.1 ± 0.1        |
| H3 <sub>19-33</sub> K27me1      | QLATK AARK <sub>me1</sub> SAPATG                    | 32 ± 1            |
| H3 <sub>19-33</sub> K27me2      | QLATK AARK <sub>me2</sub> SAPATG                    | 44.2 ± 0.2        |
| H3 <sub>19-33</sub> K27me3      | QLATK AARK <sub>me3</sub> SAPATG                    | 32 ± 2            |
| H4 <sub>12-27</sub> K20me3      | GGAKRHRK <sub>me3</sub> VLRDNIQ                     | 68.3 ± 0.5        |
| H4 <sub>15-27</sub> K20me1      | AKRHRK <sub>me1</sub> VLRDN                         | 31 ± 4            |
| H4 <sub>15-27</sub> K20me2      | AKRHRK <sub>me2</sub> VLRDN                         | 19.8 ± 0.6        |
| H4 <sub>15-27</sub> K20me3      | AKRHRK <sub>me3</sub> VLRDN                         | 44.3 ± 0.3        |

## Supplementary Table S1. Competitive enzymatic assays for cathepsin L with histone-derived peptides.

\* Peptide numbering corresponds to the sequences of the H3 and H4 histone tails.

\*\*Sites of post-translational modification are numbered, mutations are shown in bold.

\*\*\*relative to the average rate of observed inhibition obtained for the unrelated peptides PPGMR<sub>me2</sub>GPPP and PPGMR<sub>me2</sub>PPMGP.

| H3 Peptides*                    | Sequence**                                               | (%) Inhibition*** |
|---------------------------------|----------------------------------------------------------|-------------------|
| H3 <sub>12-33</sub> K18ac       | GGK APRK <sub>ac</sub> QLATK AARK SAPATG                 | 68.0 ± 0.7        |
| H3 <sub>12-33</sub> K23ac       | GGK APRK QLATK <sub>ac</sub> AARK SAPATG                 | 81.3 ± 0.3        |
| H3 <sub>12-33</sub> K18acK23ac  | GGK APRK <sub>ac</sub> QLATK <sub>ac</sub> AARK SAPATG   | 59 ± 4            |
| H3 <sub>12-33</sub> K23acK27me1 | GGK APRK QLATK <sub>ac</sub> AARK <sub>me1</sub> SAPATG  | 84 ± 2            |
| H3 <sub>12-33</sub> K23acK27me2 | GGK APRK QLATK <sub>ac</sub> AARK <sub>me2</sub> SAPATG  | 79.9 ± 0.5        |
| H3 <sub>12-33</sub> K23acK27me3 | GGK APRK QLATK <sub>ac3</sub> AARK <sub>me3</sub> SAPATG | 57 ± 4            |
| H3 <sub>12-33</sub> K18acK27me1 | GGK APRK <sub>ac</sub> QLATK AARK <sub>me1</sub> SAPATG  | 61 ± 4            |
| H3 <sub>12-33</sub> K18acK27me2 | GGK APRK <sub>ac</sub> QLATK AARK <sub>me2</sub> SAPATG  | 68 ± 1            |
| H3 <sub>12-33</sub> K18acK27me3 | GGK APRK <sub>ac</sub> QLATK AARK <sub>me3</sub> SAPATG  | 61 ± 3            |
| H3 <sub>14-31</sub> L20AK27me1  | K APRK QAATK AARK <sub>me1</sub> SAPA                    | nd                |

**Supplementary Table S2. Competitive enzymatic assays for cathepsin L with FITC-labeled H3-derived peptides.**

\* Peptide numbering corresponds to the sequences of the H3 histone tails.

\*\*Sites of post-translational modification are numbered, mutations are shown in bold.

\*\*\*relative to the average rate of observed inhibition obtained for the unrelated, FITC-labeled peptides PPGMR<sub>me2</sub>GPPP and PPGMR<sub>me2</sub>PPMGP.

nd, not detected

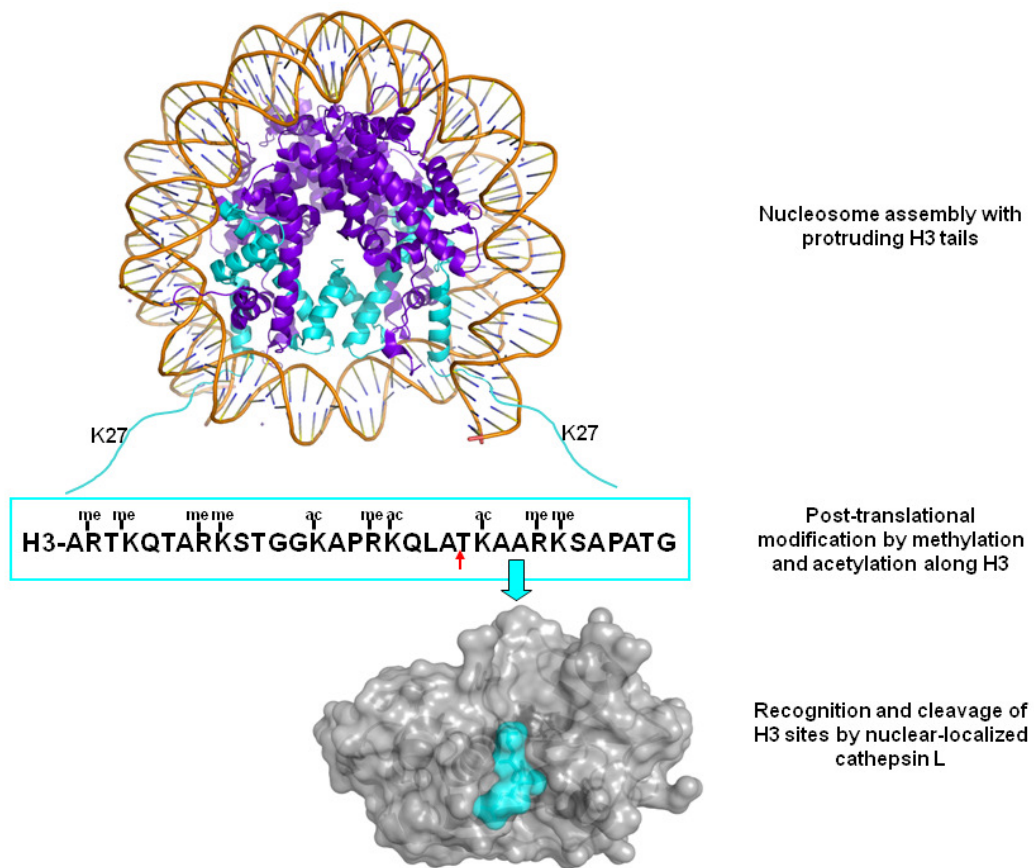

**Supplementary Figure S1. Cathepsin L cleaves accessible histone H3 tails.** In this work, we have studied the molecular mechanisms of cathepsin L processing of the histone H3 tail. H3 histones are colored in cyan in the nucleosome structure (top) and a histone H3 tail is colored in cyan in the surface representation (bottom). The N-terminal sequence of histone H3 is shown in the middle panel with identified modifications. The cleavage site is marked by a red arrow.

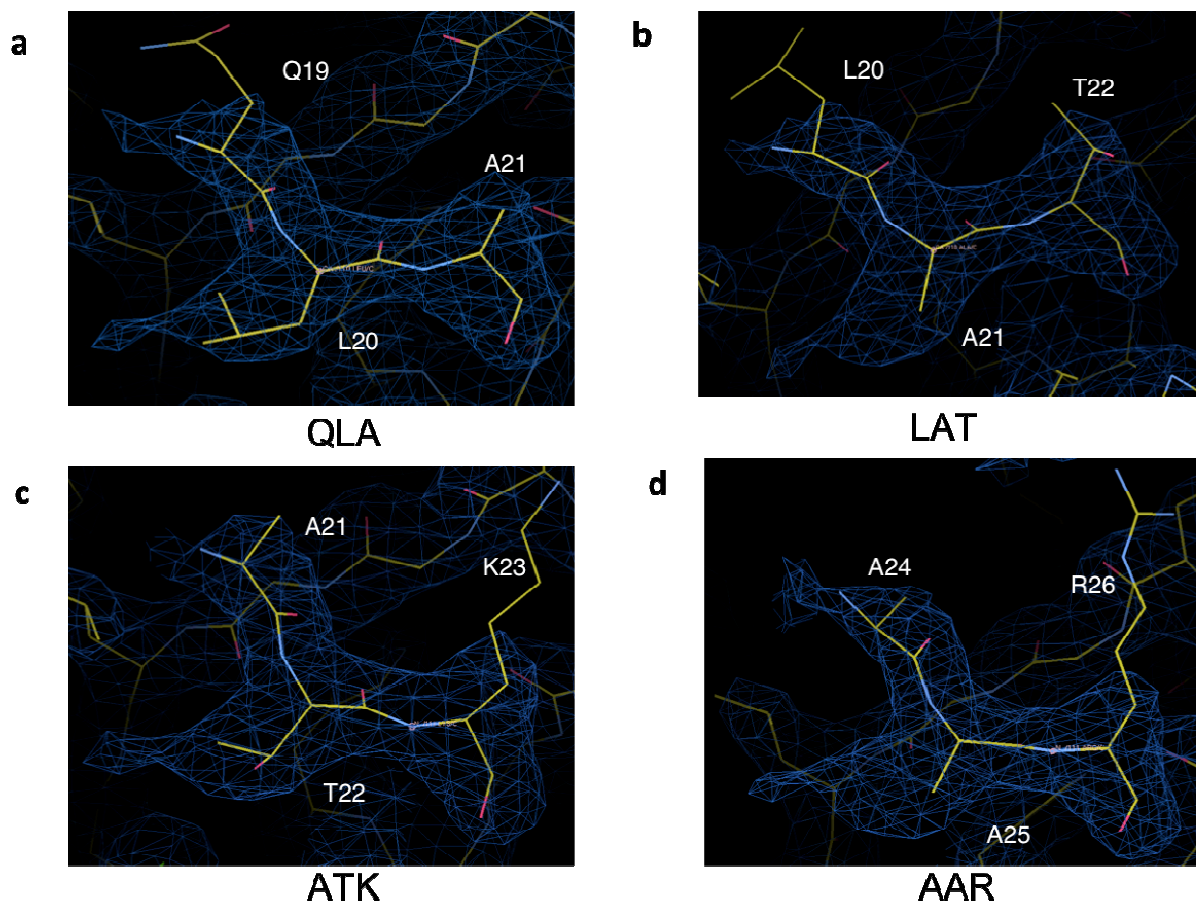

**Supplementary Figure S2. Systematic shifting of the histone H3 peptide register throughout the active site cleft placing other major cleavage sites in the S2 subsite.** Only three residues from the histone H3 peptide are visible in the electron density map of the complex structure. In the previous study by Duncan *et al*<sup>16</sup>, four major cleavage sites were identified: QLA|T|K|AAR|KSA. | denotes the scissile bond. The tripeptides tried in this test are: a: QLA; b: LAT; c, ATK; d: AAR. The electron density map is generated with the histone peptide omitted. Peptide sequence used in crystallization is QLATKAARKSAPATG
